# Supplementary material for: Athermal repair of nanoscale defects in optical materials using a femtosecond laser
Source: Royal Society of Chemistry journal article supplement (doi:10.1039/c7nr01599b), 2017-01-01
Supplement: c7nr01599b1.pdf [file c7nr01599b1.pdf]

## Supplementary Information

# Athermal Repair Nanoscale Defects in Optical Materials Using Femtosecond Laser

Qiang Cao<sup>1\*</sup>, Jiajun Zhang<sup>1</sup>, Jian Du<sup>2</sup>, Hongming Zhao<sup>2</sup>, Sheng Liu<sup>3</sup> and Qing  
Peng<sup>3,4\*</sup>

<sup>1</sup>Laser Micro/NanoFabrication Laboratory, NanoManufacturing Fundamental  
Research Joint Laboratory of National Science Foundation of China, School of  
Mechanical Engineering, Beijing Institute of Technology, 100081, PR China

<sup>2</sup>Science and Technology on Special System Simulation Laboratory, Beijing  
Simulation Center, Beijing, 100854, PR China

<sup>3</sup>Nuclear Engineering and Radiological Sciences, University of Michigan, Ann Arbor,  
MI 48109, USA

<sup>4</sup>School of Power and Mechanical Engineering, Wuhan University, Wuhan, 430072,  
China

\*Corresponding Author: [caoqiang@bit.edu.cn](mailto:caoqiang@bit.edu.cn) (Qiang Cao), [qpeng.org@gmail.com](mailto:qpeng.org@gmail.com)  
(Qing Peng)

## 1. AFM images

We have studied the structures of the femtosecond laser irradiated area of as-implanted fused silica using atomic force microscopy (AFM) after irradiated at different fluence. When the laser fluence is about  $0.2 \text{ J/cm}^2$ , the AFM images are shown in Figure S1. Compared to the image of those irradiated at the fluence of  $0.5 \text{ J/cm}^2$  (Figure S2), we notice that there is no crater in the irradiated area, which means that no ablation effect happens, as preferred.

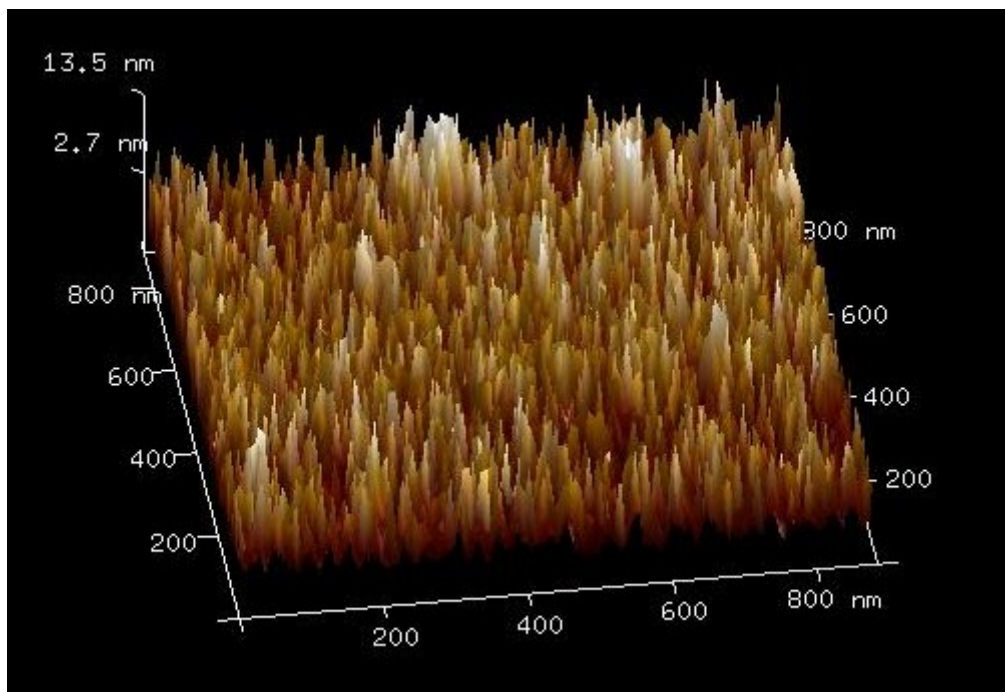

**Figure S1.** The AFM image of the femtosecond laser irradiated area of as-implanted fused silica. When the laser fluence is about  $0.2 \text{ J/cm}^2$ , there is no crater in the

irradiated area, which means that no ablation effect happens.

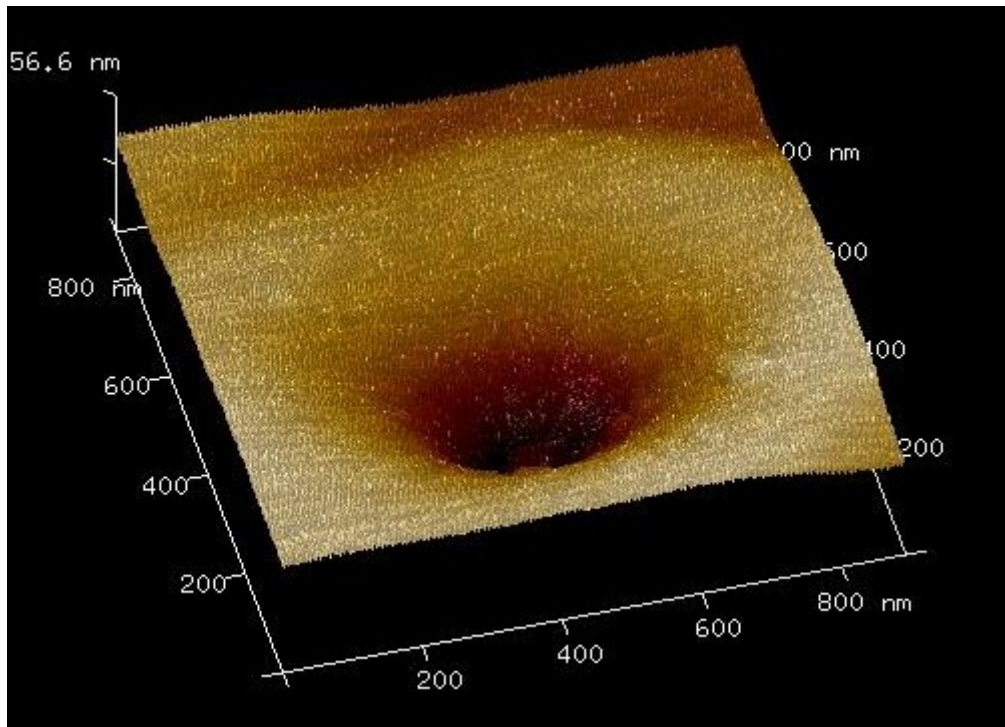

**Figure S2.** The AFM image of the femtosecond laser irradiated area of as-implanted fused silica. When the laser fluence is above  $0.5 \text{ J/cm}^2$ , there is a nanoscale crater in the irradiated area.
